# Supplementary material for: Use of Machine Learning with Fused Spectral Data for Prediction of Product Sensory Characteristics: The Case of Grape to Wine
Source: MDPI journal article supplement (doi:10.3390/foods12040757), 2023-02-09
Supplement: s1 [file s1]

## SUPPLEMENTARY MATERIAL FOR

### Use of Machine Learning with Fused Spectral Data for Prediction of Product Sensory Characteristics: The Case of Grape to Wine

Claire E. J. Armstrong <sup>1,2</sup>, Jun Niimi <sup>2,3,†</sup>, Paul K. Boss <sup>1,3</sup>, Vinay Pagay <sup>1,2</sup>, David W. Jeffery <sup>1,2,\*</sup>

<sup>1</sup> Australian Research Council Training Centre for Innovative Wine Production, The University of Adelaide, PMB 1, Glen Osmond, SA 5064, Australia

<sup>2</sup> School of Agriculture, Food and Wine, and Waite Research Institute, The University of Adelaide, PMB 1, Glen Osmond, SA 5064, Australia

<sup>3</sup> CSIRO Agriculture and Food, Locked Bag 2, Glen Osmond, SA 5064, Australia

\* Correspondence: david.jeffery@adelaide.edu.au

† Present address: Division of Bioeconomy and Health, RISE Research Institutes of Sweden, Gothenburg, 412 76, Sweden

#### Table of Contents

|                                                                                                                                                                                                                               | Page           |
|-------------------------------------------------------------------------------------------------------------------------------------------------------------------------------------------------------------------------------|----------------|
| <b>Figure S1.</b> Map of Australia with South Australia highlighted in red. Inset shows the eight South Australian GIs (and their abbreviations) where grape parcels were obtained in 2013, 2014, and 2015 (n = 74 in total). | <b>S2</b>      |
| <b>Table S1.</b> Values used in grid-search to optimise XGB hyperparameters for the predictions of wine sensory attributes using A-TEEM data alone or feature-level fused A-TEEM and CIELAB data.                             | <b>S2</b>      |
| <b>Figure S2:</b> Scree plot of the percentage of explained variance of principal components (PCs) from principal component analysis using (a) A-TEEM data, and (b) CIELAB colour coordinates                                 | <b>S3</b>      |
| <b>Figure S3.</b> A-TEEM variable loadings on PC3 to 7 from principal component analysis                                                                                                                                      | <b>S3</b>      |
| <b>Figure S4.</b> Percentage of contributions of the top ten highest contributing variables on (a) PC1 to (g) PC7, from principal component analysis (PCA) of A-TEEM data.                                                    | <b>S4</b>      |
| <b>Figure S5.</b> Correlation matrix plot for the relationship between the seven selected principal components from principal component analysis (PCA) using A-TEEM data and the top ten most contributing variables          | <b>S5</b>      |
| <b>Figures S6-27.</b> (a) A-TEEM variable loadings on partial least squares (PLS) regression latent variables (LVs) and (b) gain brought by LVs for branches in the XGB algorithm.                                            | <b>S6–S16</b>  |
| <b>Figures S28-49.</b> The gain brought by principal components (PCs) of A-TEEM and CIELAB datasets after principal component analysis for branches in the XGB algorithm.                                                     | <b>S17–S22</b> |

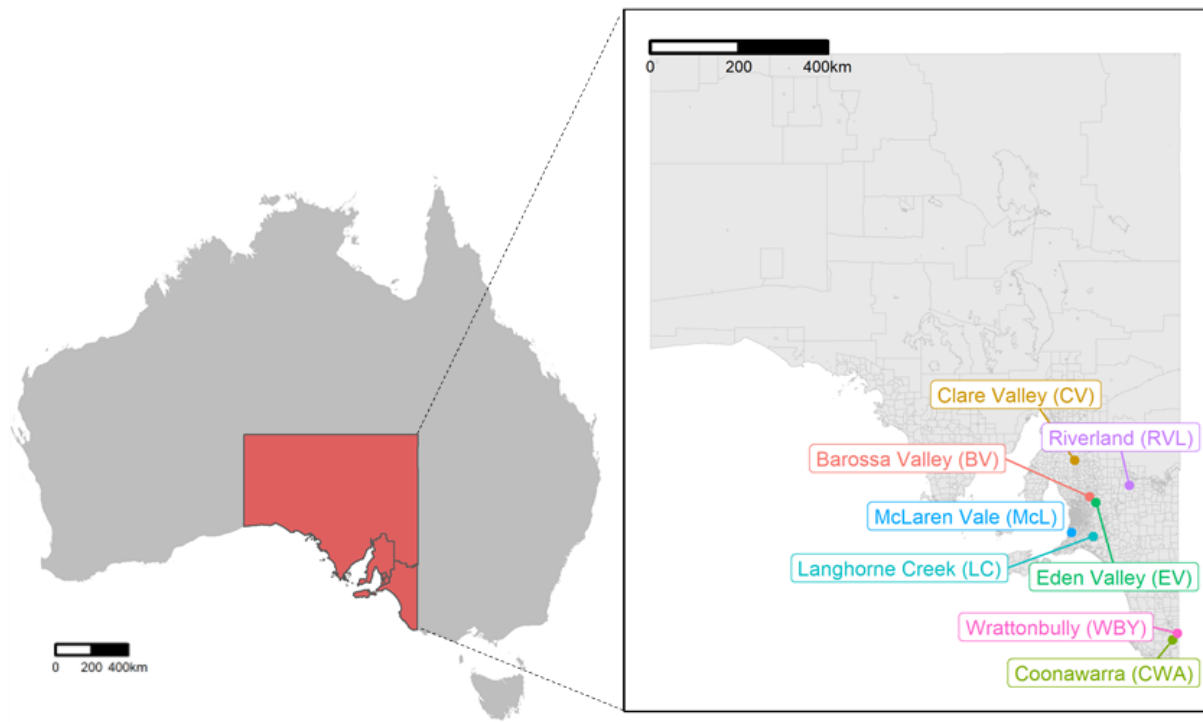

**Figure S1.** Map of Australia with South Australia highlighted in red. Inset shows the eight South Australian GIs (and their abbreviations) where grape parcels were obtained in 2013, 2014, and 2015 ( $n = 74$  in total).

**Table S1.** Values used in grid-search to optimise XGB hyperparameters for the predictions of wine sensory attributes using A-TEEM data alone or feature-level fused A-TEEM and CIELAB data.

|             | Description                                                                                             | Grid search values for models using A-TEEM data | Grid search values for models using fused A-TEEM and CIELAB data |
|-------------|---------------------------------------------------------------------------------------------------------|-------------------------------------------------|------------------------------------------------------------------|
| max_depth   | Maximum depth of a tree (i.e. number of branches)                                                       | 1, 2, 3, 4, 5, 6                                | 1, 2, 3, 4, 5, 6                                                 |
| num_round   | Maximum number of decision trees in ensemble                                                            | 50, 100, 200, 300, 400, 500, 600                | 50, 100, 200, 300, 400, 500, 600                                 |
| eta         | Shrinkage value for feature weights to make boosting process more conservative                          | 0.02, 0.04, 0.08, 0.1, 0.2, 0.3, 0.4, 0.5       | 0.02, 0.04, 0.08, 0.1, 0.2, 0.3, 0.4, 0.5                        |
| alpha       | L1 regularization term on weights                                                                       | 1                                               | 1                                                                |
| lambda      | L2 regularization term on weights                                                                       | 2                                               | 2                                                                |
| gamma       | Before further partition on a leaf node of a tree, the minimum loss reduction (gamma) must be achieved. | 0.2                                             | 0.4                                                              |
| compression | Method used for dimension reduction                                                                     | PLS with 2 to 6 LVs                             | None                                                             |
| declutter   | Method to remove clutter covariance on X-Block                                                          | GLSW ( $\alpha = 0.02$ ) or EPO (3 LVs)         | GLSW ( $\alpha = 0.02$ ) or EPO (3 LVs)                          |

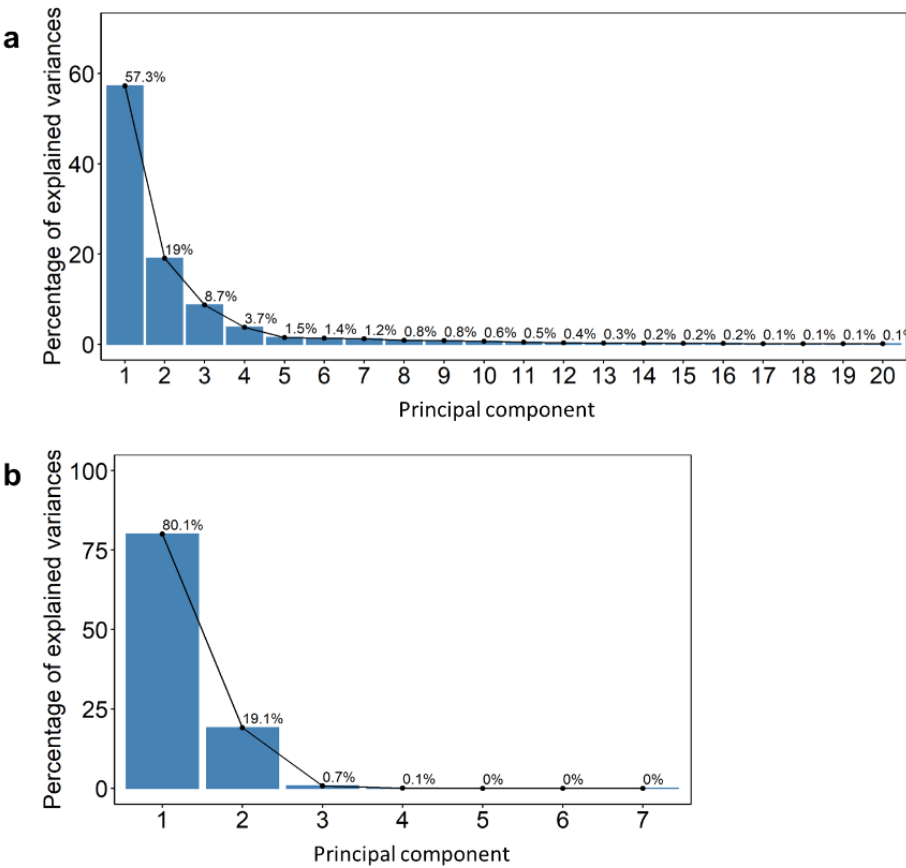

**Figure S2.** Scree plot of the percentage of explained variance of principal components (PCs) from principal component analysis (PCA) using (a) A-TEEM data, and (b) CIELAB colour coordinates.

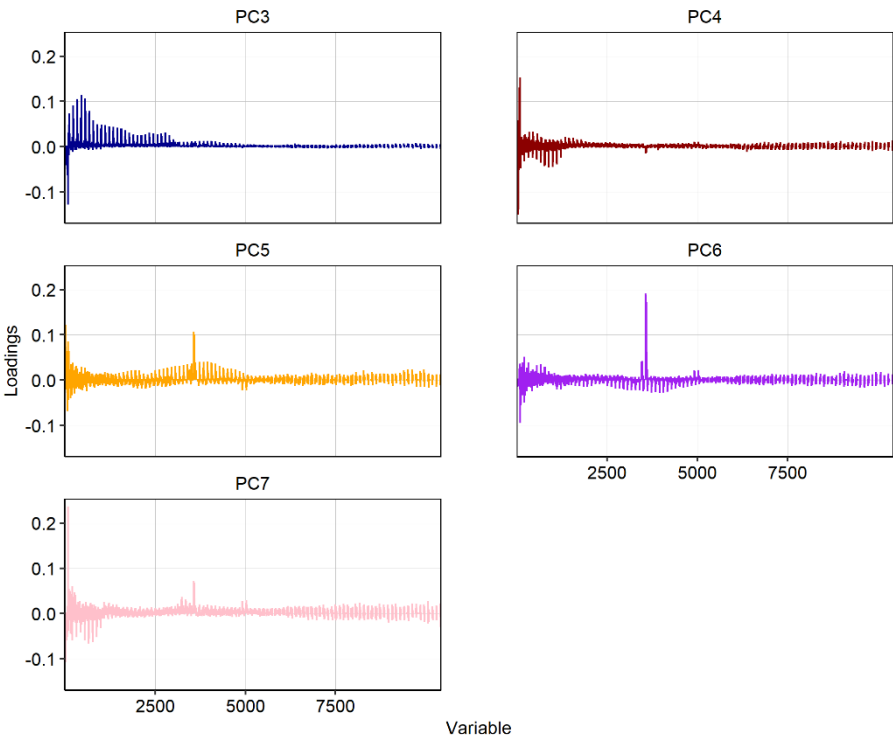

**Figure S3.** A-TEEM variable loadings on PC3 to 7 from PCA performed before feature-level data fusion.

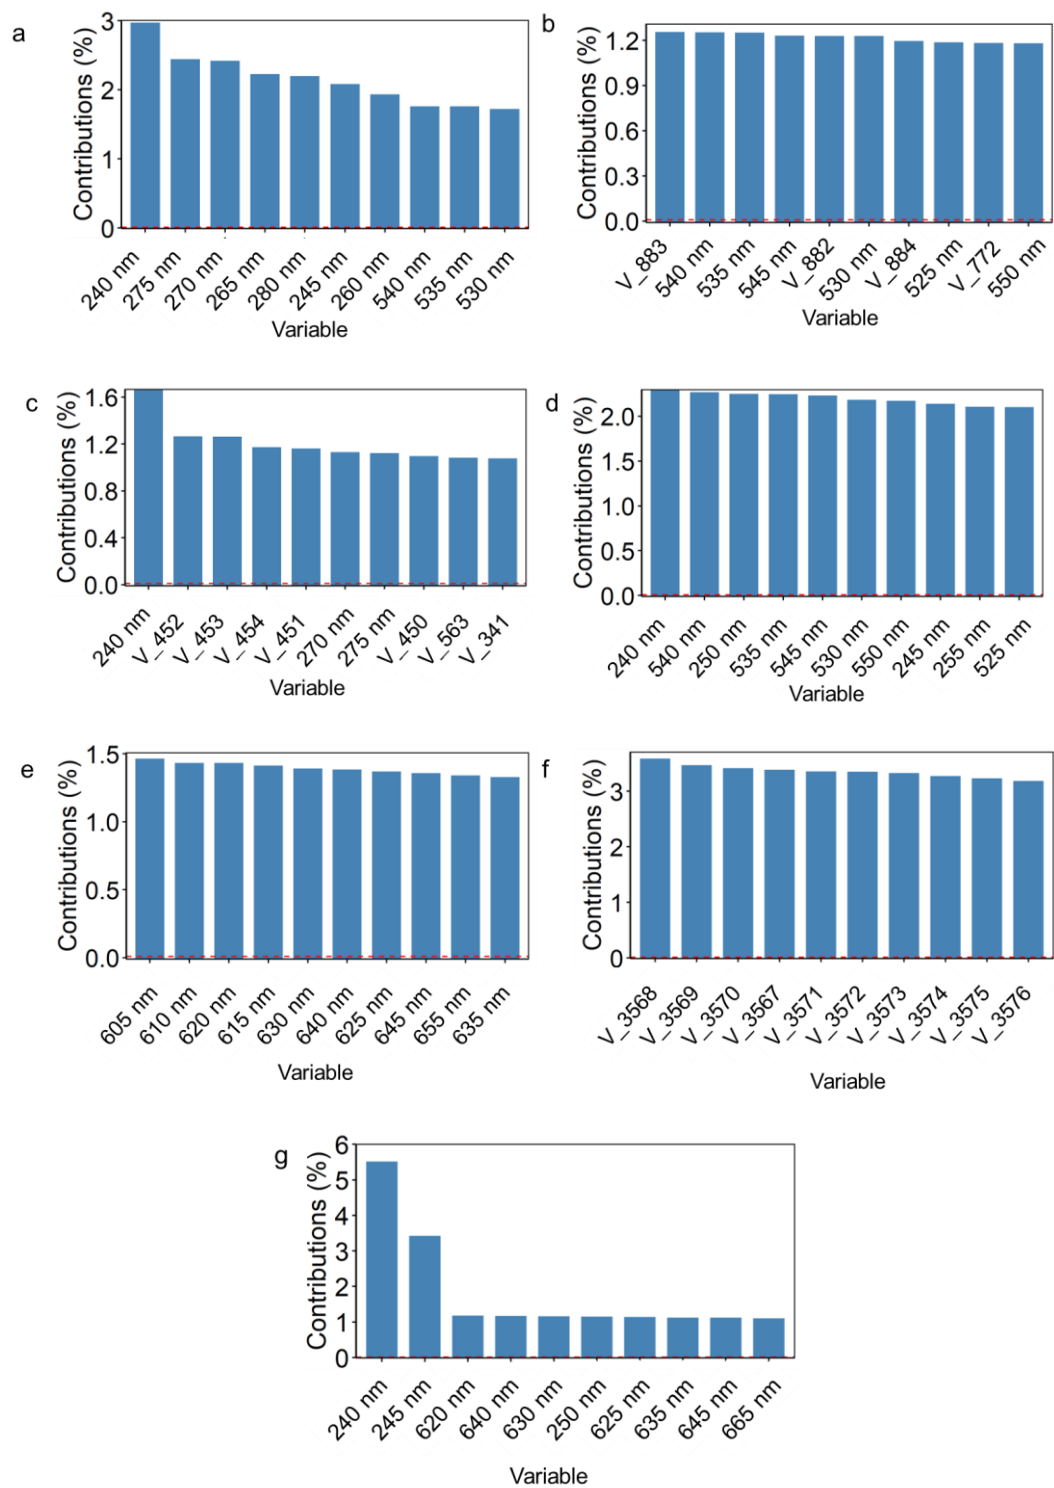

**Figure S4.** Percentage of contributions of the top ten highest contributing variables on (a) PC1 to (g) PC7, from principal component analysis of A-TEEM data.

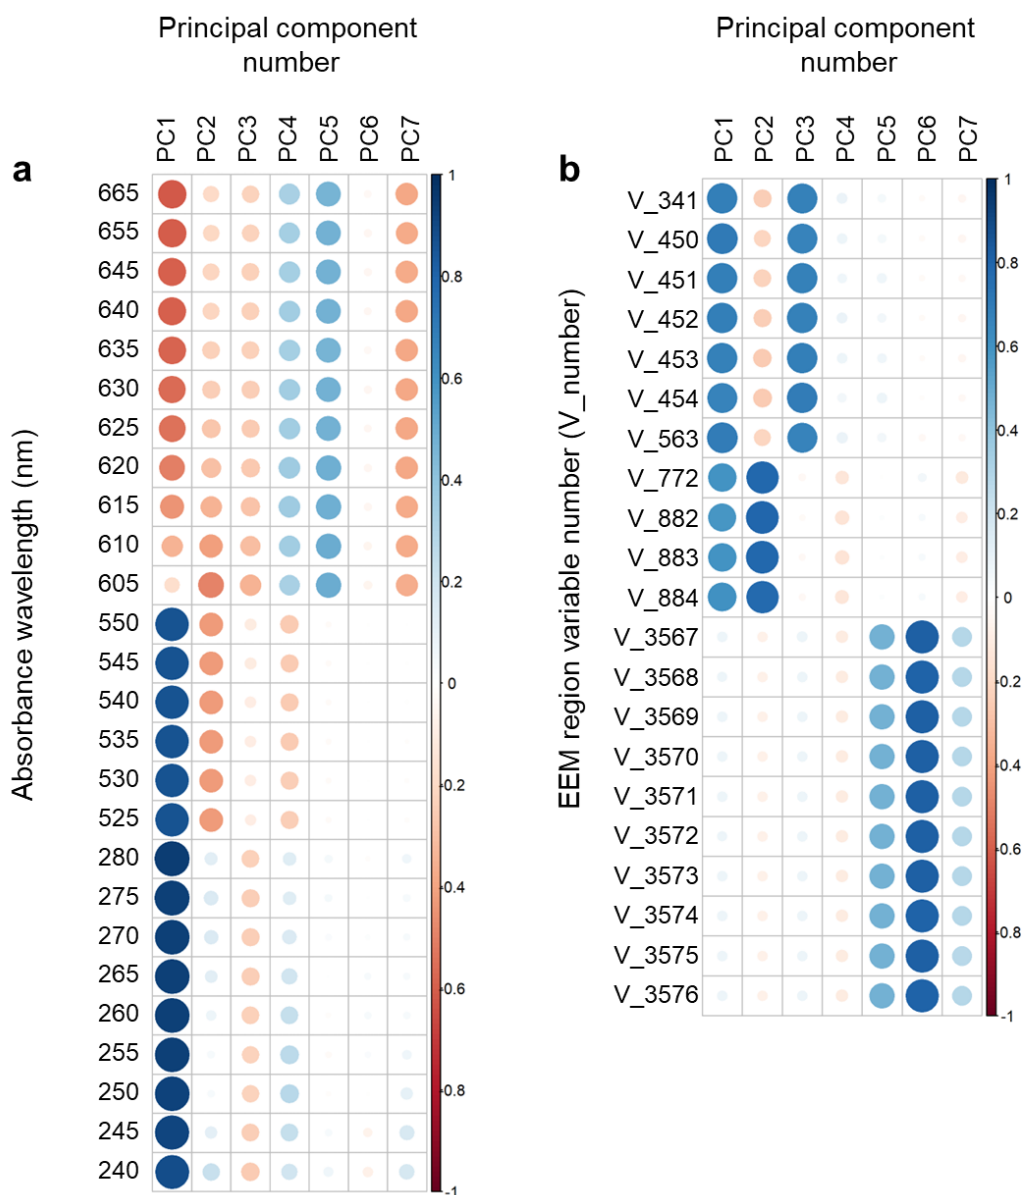

**Figure S5.** Correlation matrix plot for the relationship between the seven selected principal components (PCs) from principal component analysis using A-TEEM data and the top ten most contributing variables (see Figure S1) to the seven PCs, divided into (a) the absorbance region of A-TEEM, which is variable 1 to 93 and relates to absorbance wavelength 700 to 240 nm (with 5 nm increments), respectively, and (b) the 2D EEM region of A-TEEM, which is variable 94 to 10416. A strong positive linear correlation with a value of 1 between two variables is coloured dark blue and a strong negative linear correlation with a value of -1 is coloured dark red. The size of circles also depicts the strength of the relationship.

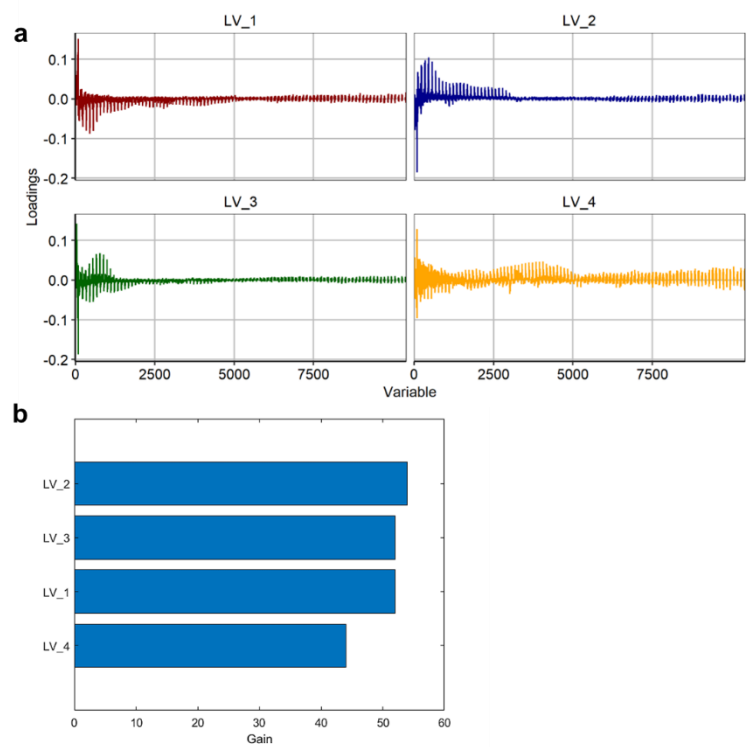

**Figure S6.** (a) A-TEEM variable loadings on partial least squares (PLS) regression latent variables (LVs) 1-4 used in the XGB algorithm to predict confectionery aroma attribute scores and (b) the gain of LVs.

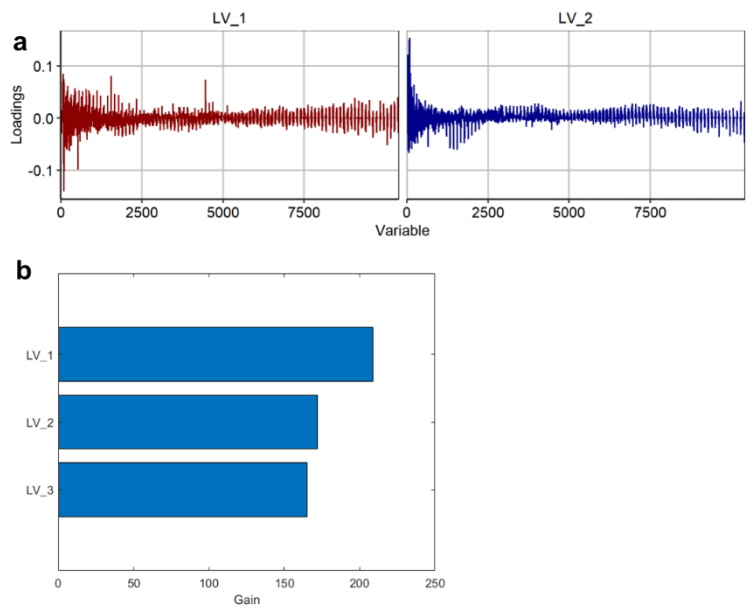

**Figure S7.** (a) A-TEEM variable loadings on PLS LVs 1 and 2 used in the XGB algorithm to predict dark fruit aroma attribute scores and (b) the gain of LVs.

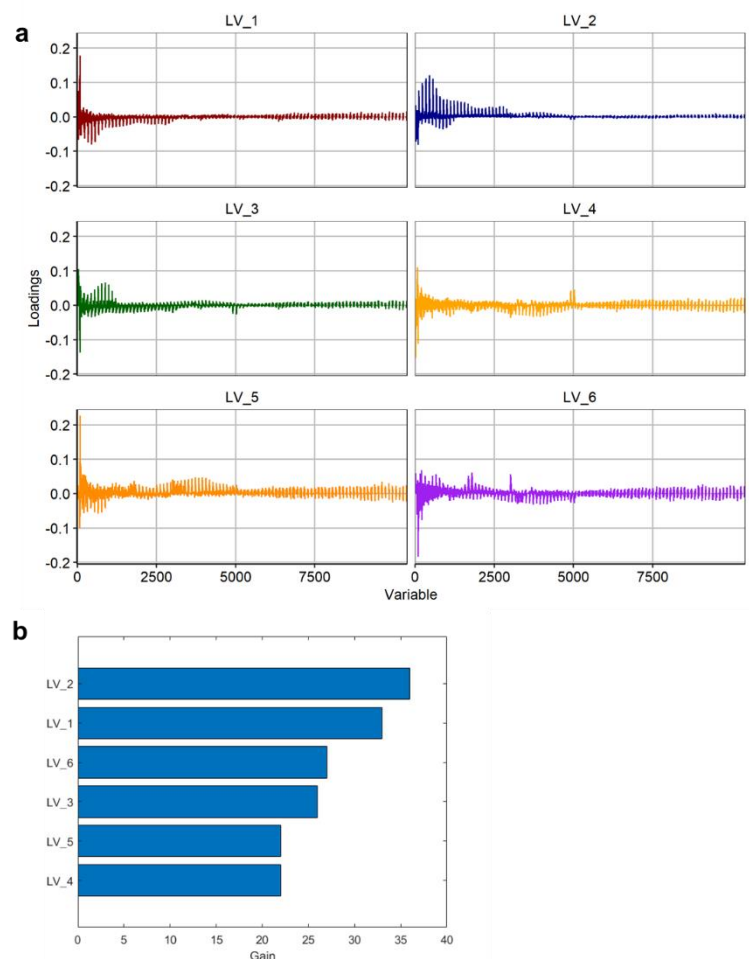

**Figure S8.** (a) A-TEEM variable loadings on partial least squares (PLS) regression latent variables (LVs) 1-6 used in our XGB algorithm to predict earthy aroma attribute scores and (b) the gain of LVs.

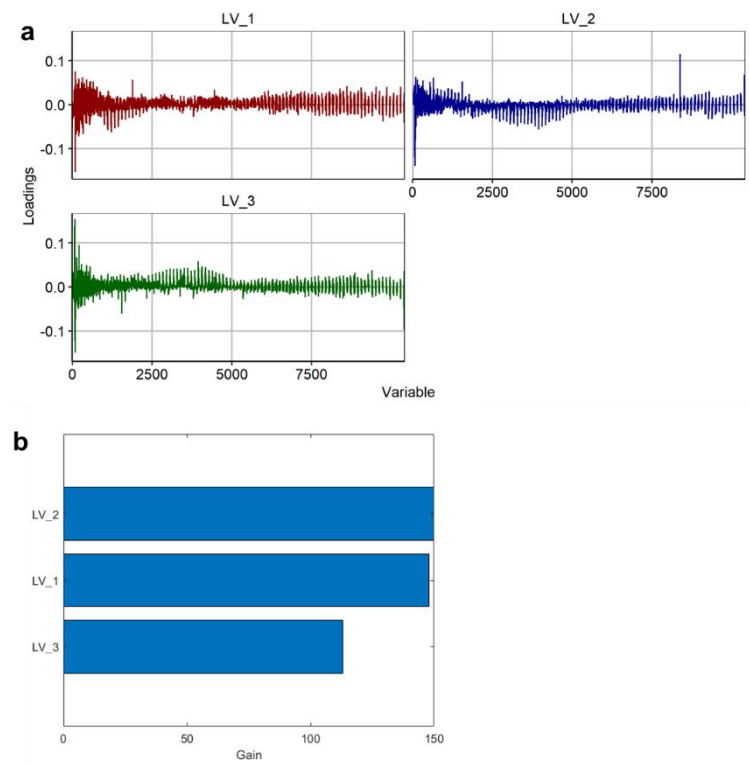

**Figure S9.** (a) A-TEEM variable loadings on PLS LVs 1-3 used in the XGB algorithm to predict green aroma attribute scores and (b) the gain of LVs.

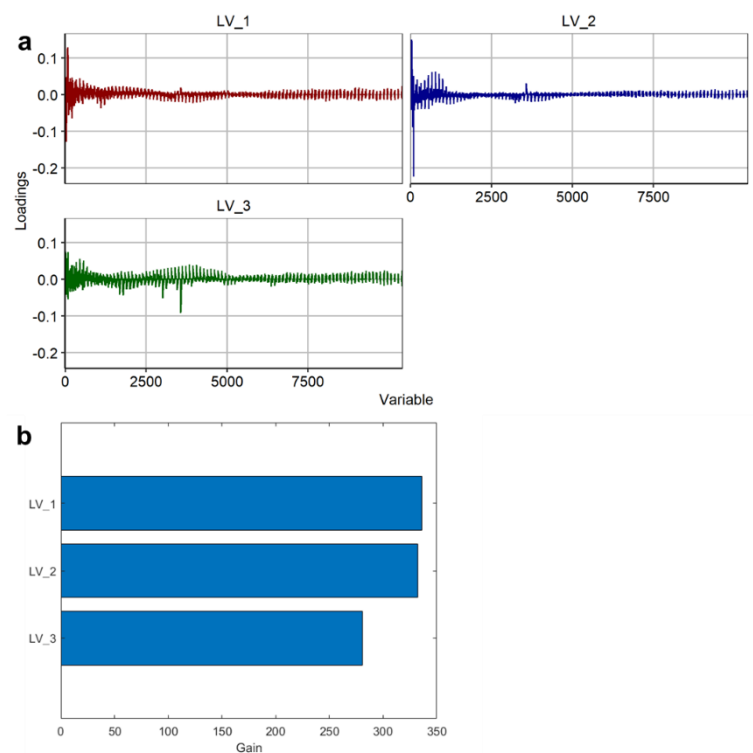

**Figure S10.** (a) A-TEEM variable loadings on partial least squares (PLS) regression latent variables (LVs) 1-4 used in the XGB algorithm to predict overall intensity aroma attribute scores and (b) the gain of LVs.

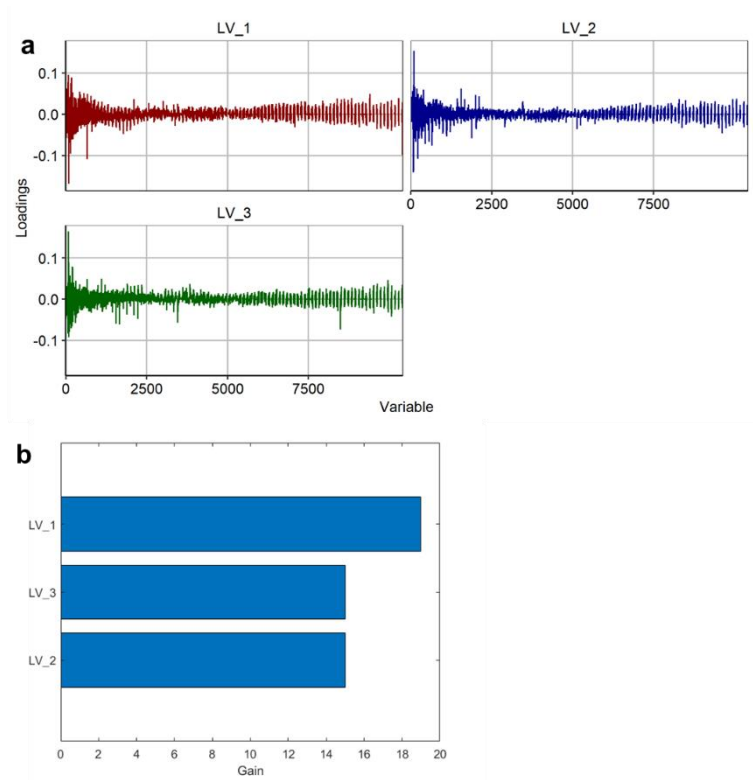

**Figure S11.** (a) A-TEEM variable loadings on PLS LVs 1-4 used in the XGB algorithm to predict pepper aroma attribute scores and (b) the gain of LVs.



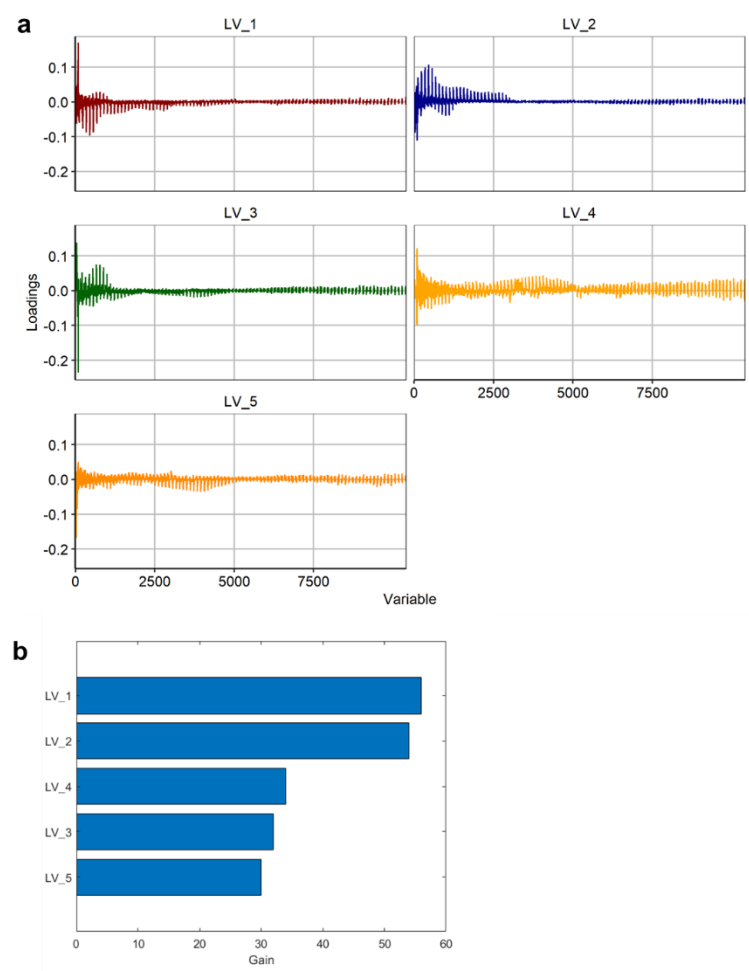

**Figure S12.** (a) A-TEEM variable loadings on partial least squares (PLS) regression latent variables (LVs) 1-4 used in the XGB algorithm to predict red fruit aroma attribute scores and (b) the gain of LVs.

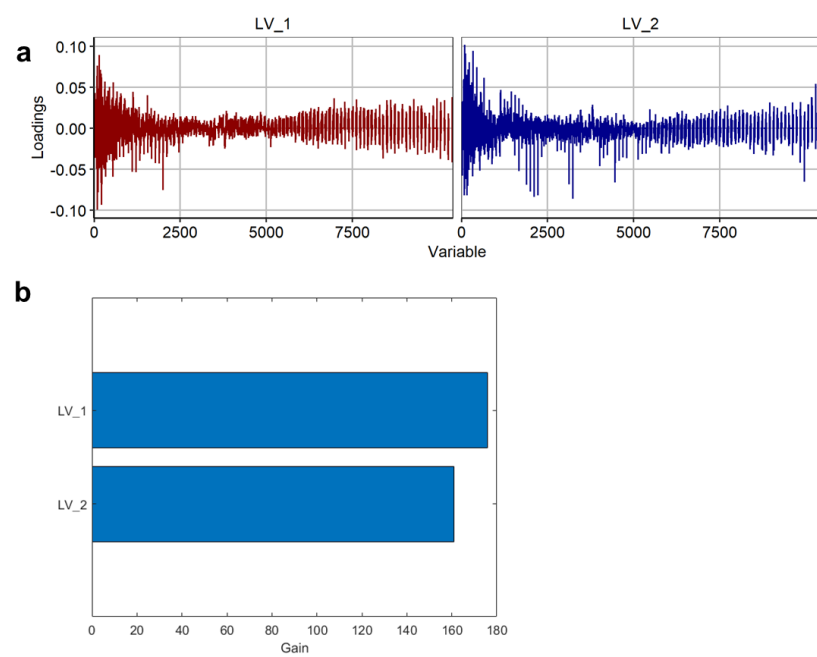

**Figure S13.** (a) A-TEEM variable loadings on PLS LVs 1-4 used in the XGB algorithm to predict savoury aroma attribute scores and (b) the gain of LVs.

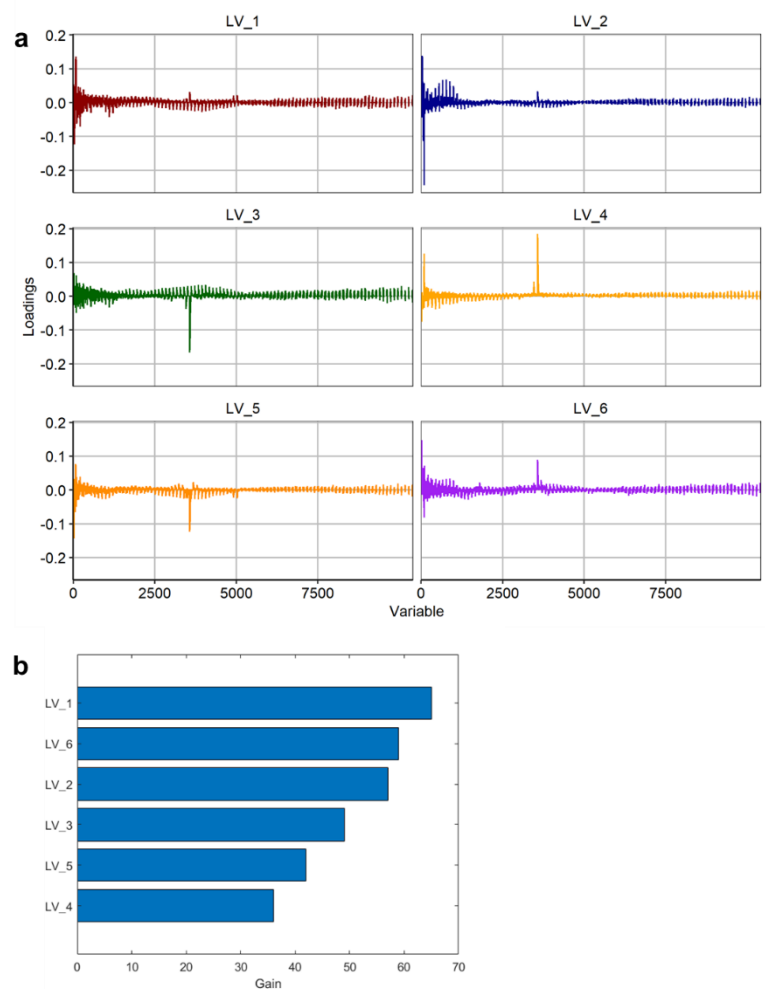

**Figure S14.** (a) A-TEEM variable loadings on partial least squares (PLS) regression latent variables (LVs) 1-4 used in the XGB algorithm to predict confectionery flavour attribute scores and (b) the gain of LVs.

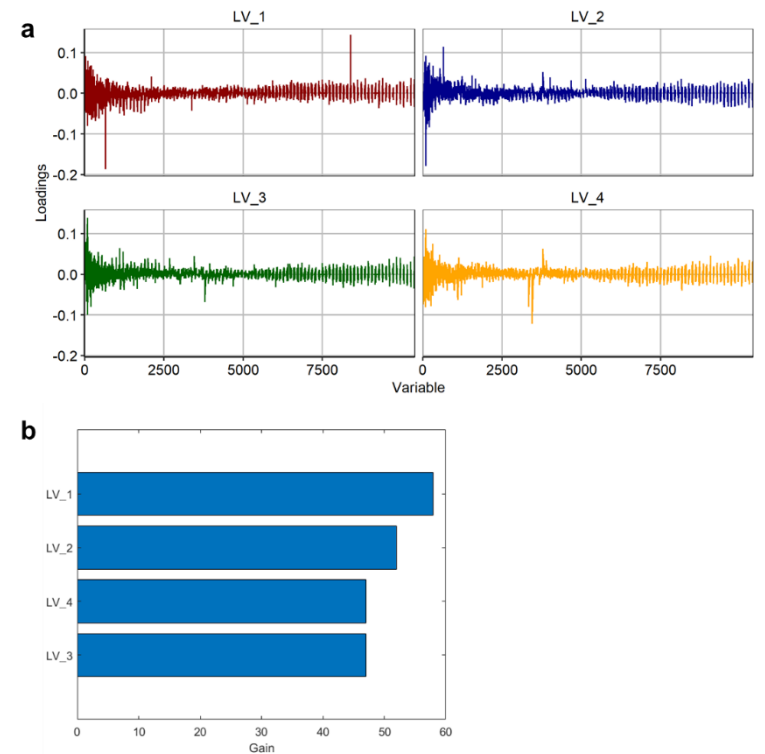

**Figure S15.** (a) A-TEEM variable loadings on PLS LVs 1-4 used in the XGB algorithm to predict dark fruit flavour attribute scores and (b) the gain of LVs.

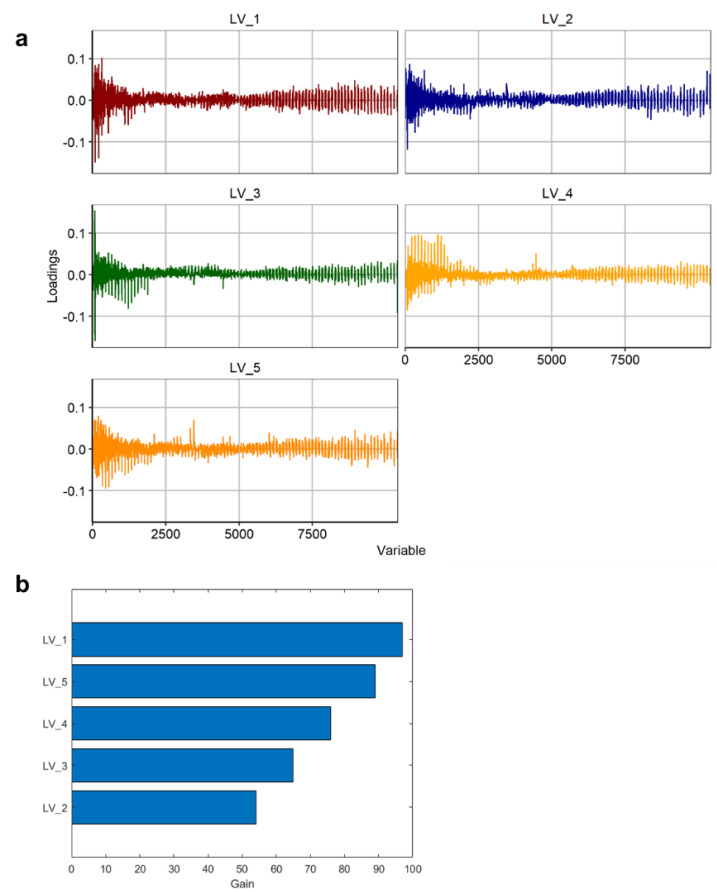

**Figure S16.** (a) A-TEEM variable loadings on partial least squares (PLS) regression latent variables (LVs) 1-4 used in the XGB algorithm to predict green flavour attribute scores and (b) the gain of LVs.

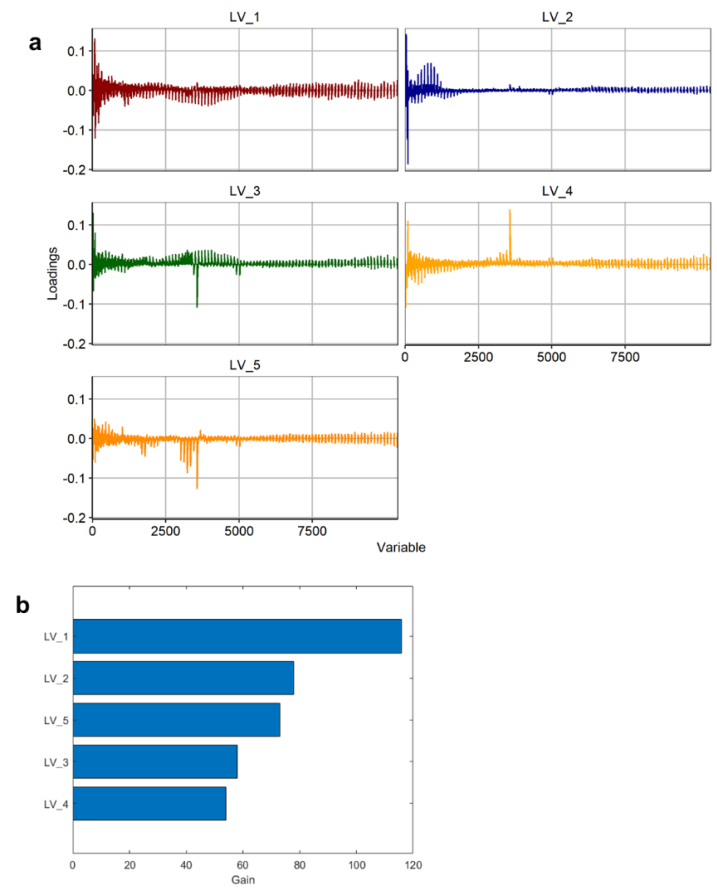

**Figure S17.** (a) A-TEEM variable loadings on PLS LV1-4 used in the XGB algorithm to predict pepper flavour attribute scores and (b) the gain of LVs.

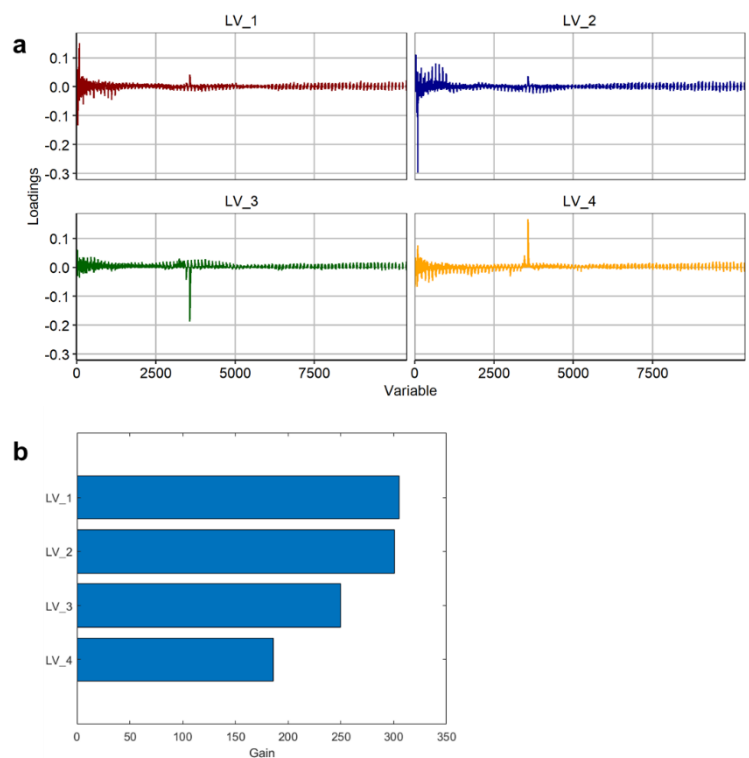

**Figure S18.** (a) A-TEEM variable loadings on partial least squares (PLS) regression latent variables (LVs) 1-4 used in the XGB algorithm to predict red fruit flavour attribute scores and (b) the gain of LVs.

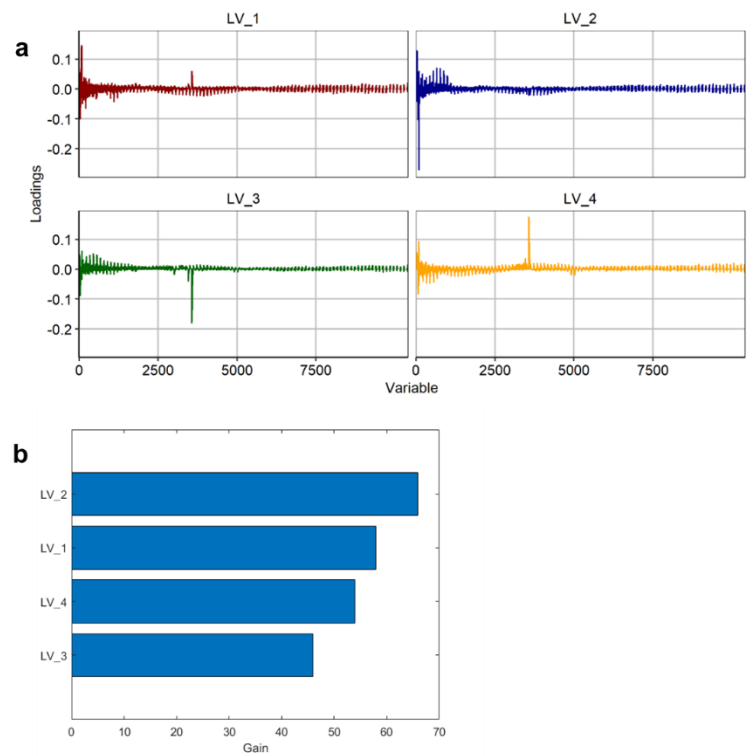

**Figure S19.** (a) A-TEEM variable loadings on PLS LVs 1-4 used in the XGB algorithm to predict savoury flavour attribute scores and (b) the gain of LVs.

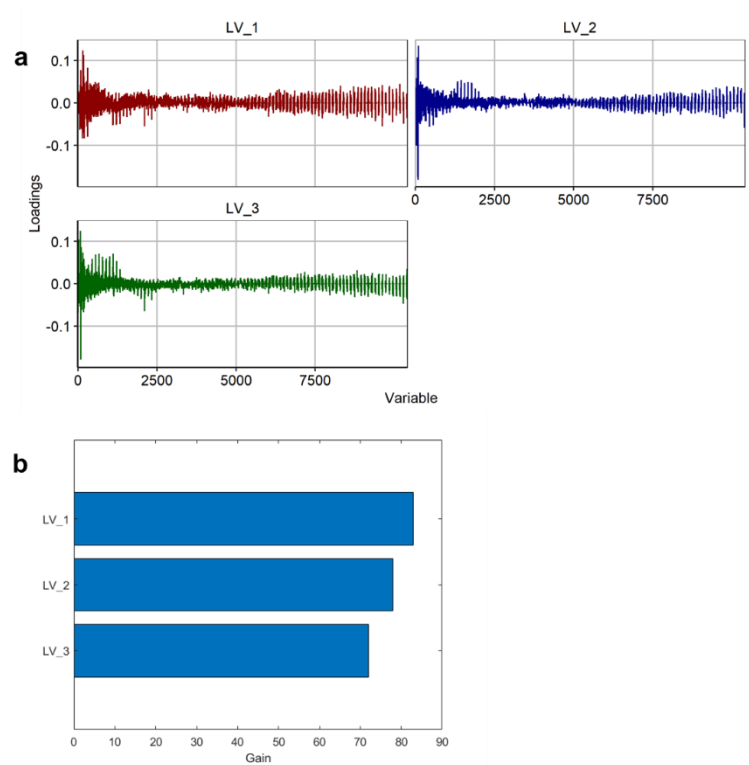

**Figure S20.** (a) A-TEEM variable loadings on partial least squares (PLS) regression latent variables (LVs) 1-4 used in the XGB algorithm to predict acid taste attribute scores and (b) the gain of LVs.

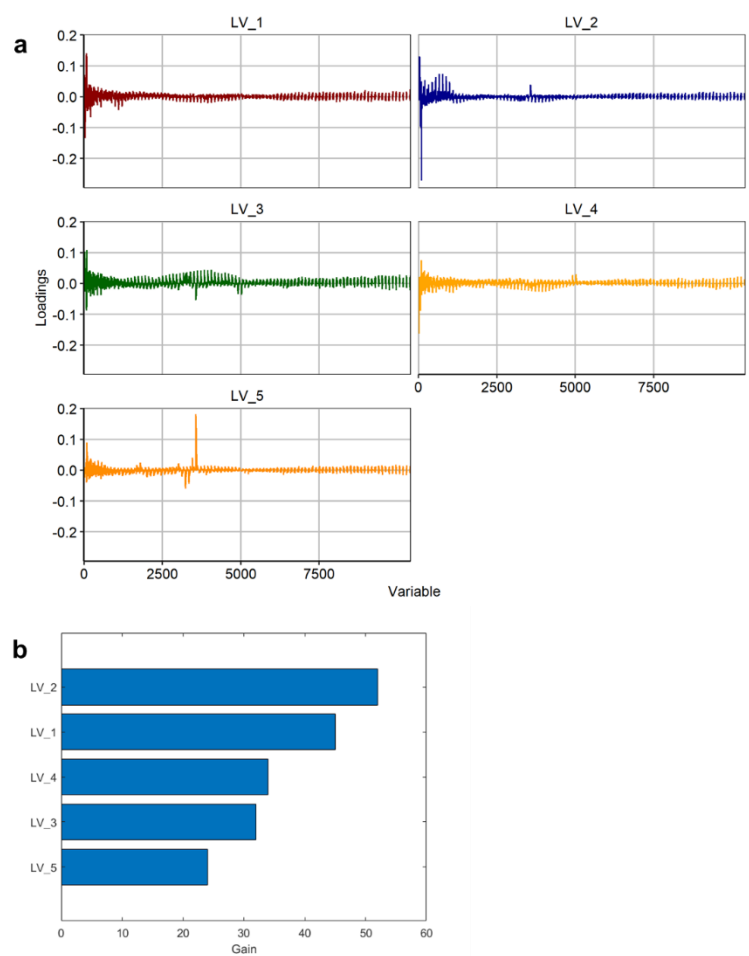

**Figure S21.** (a) A-TEEM variable loadings on PLS LVs 1-4 used in the XGB algorithm to predict bitter taste attribute scores and (b) the gain of LVs.

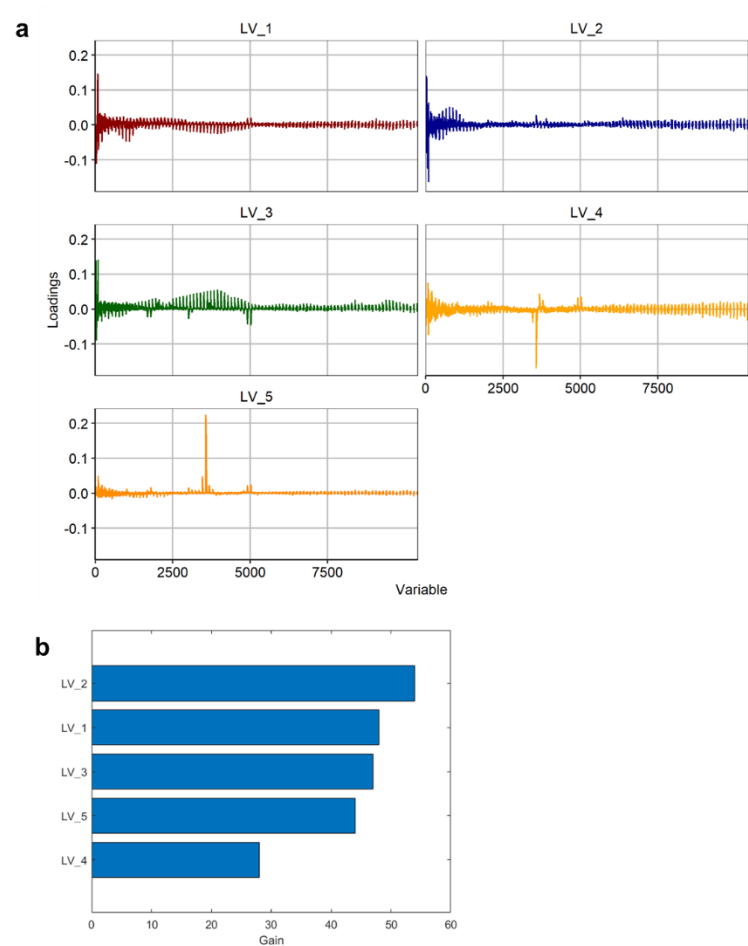

**Figure S22.** (a) A-TEEM variable loadings on partial least squares (PLS) regression latent variables (LVs) 1-4 used in the XGB algorithm to predict fruit sweetness taste attribute scores and (b) the gain of LVs.

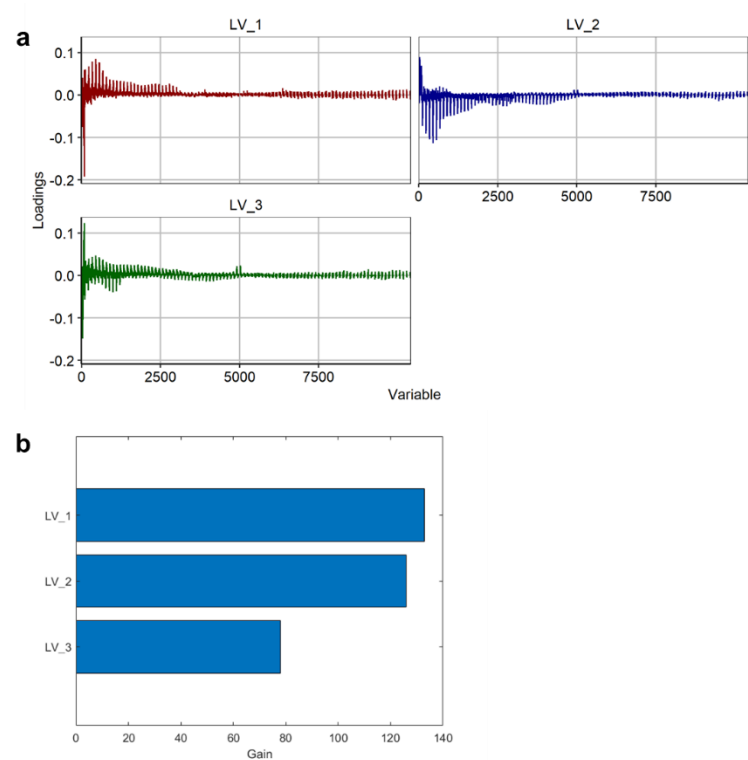

**Figure S23.** (a) A-TEEM variable loadings on PLS LVs 1-4 used in the XGB algorithm to predict alcohol intensity mouthfeel attribute scores and (b) the gain of LVs.

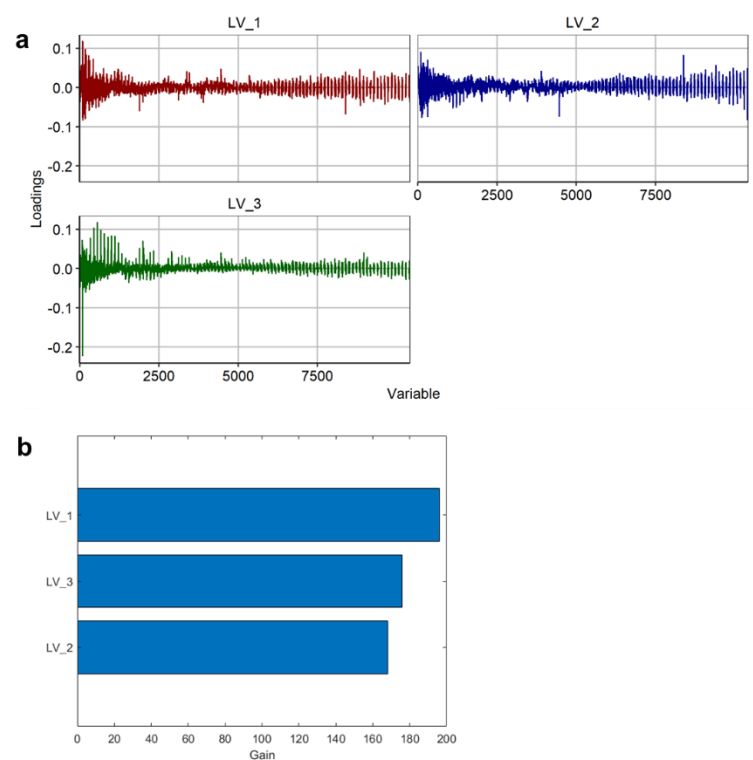

**Figure S24.** (a) A-TEEM variable loadings on partial least squares (PLS) regression latent variables (LVs) 1-4 used in the XGB algorithm to predict astringency mouthfeel attribute scores and (b) the gain of LVs.

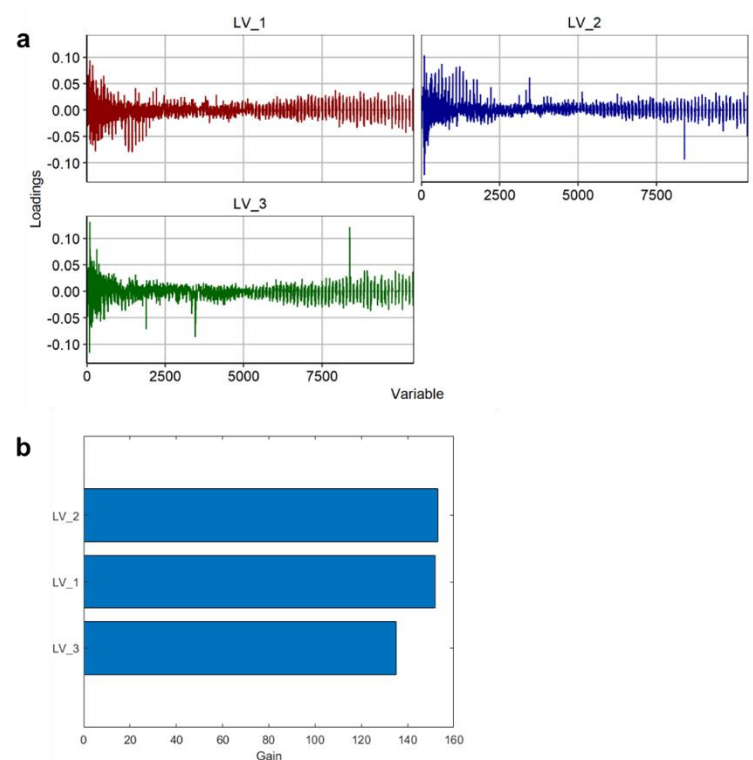

**Figure S25.** (a) A-TEEM variable loadings on PLS LVs 1-4 used in the XGB algorithm to predict body mouthfeel attribute scores and (b) the gain of LVs.

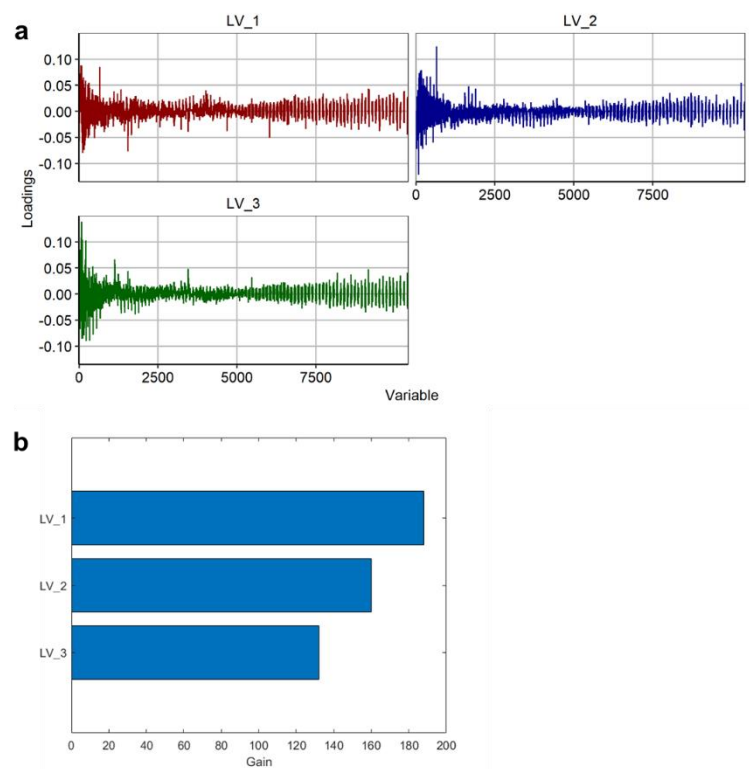

**Figure S26.** (a) A-TEEM variable loadings on partial least squares (PLS) regression latent variables (LVs) 1-4 used in the XGB algorithm to predict depth colour attribute scores and (b) the gain of LVs.

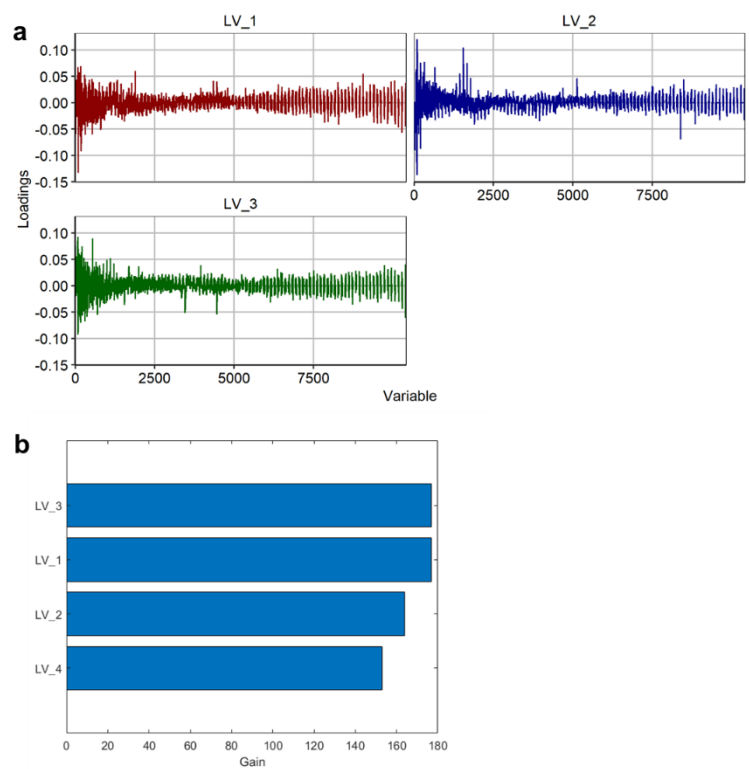

**Figure S27.** (a) A-TEEM variable loadings on PLS LVs 1-4 used in the XGB algorithm to predict hue colour attribute scores and (b) the gain of LVs.



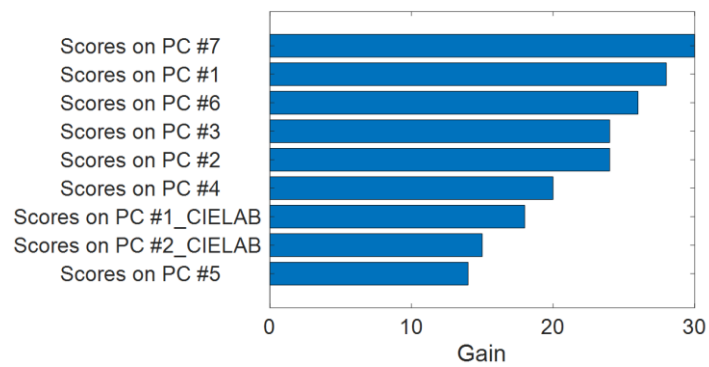

**Figure S28.** Gain of PC1-7 from principal component analysis (PCA) of A-TEEM data and PC1 and 2 from PCA of CIELAB data used to predict confectionery aroma.

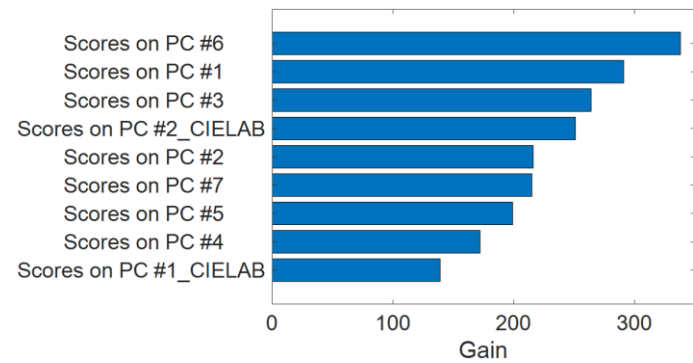

**Figure S29.** Gain of PC1-7 from PCA of A-TEEM data and PC1 and 2 from PCA of CIELAB data used to predict dark fruit aroma.

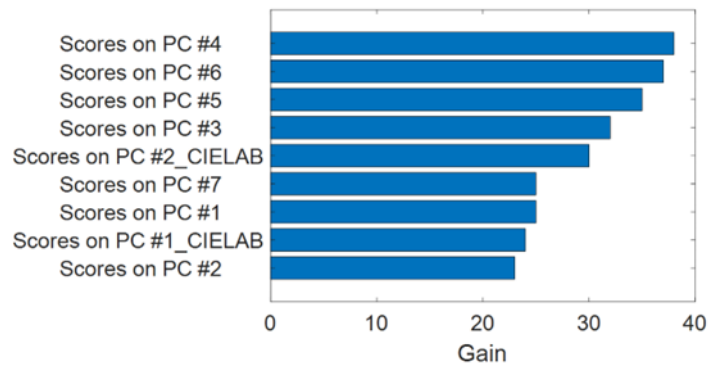

**Figure S30.** Gain of PC1-7 from PCA of A-TEEM data and PC1 and 2 from PCA of CIELAB data used to predict earthy fruit aroma.

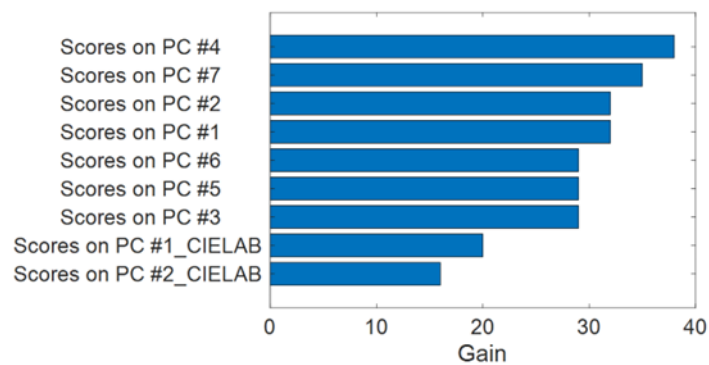

**Figure S31.** Gain of PC1-7 from PCA of A-TEEM data and PC1 and 2 from PCA of CIELAB data used to predict green fruit aroma.

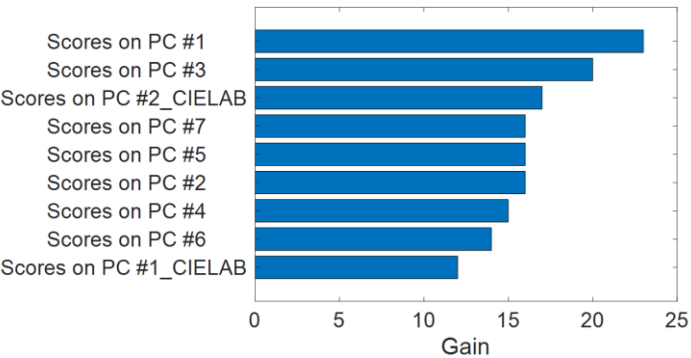

**Figure S32.** Gain of PC1-7 from principal component analysis (PCA) of A-TEEM data and PC1 and 2 from PCA of CIELAB data used to predict overall intensity aroma.

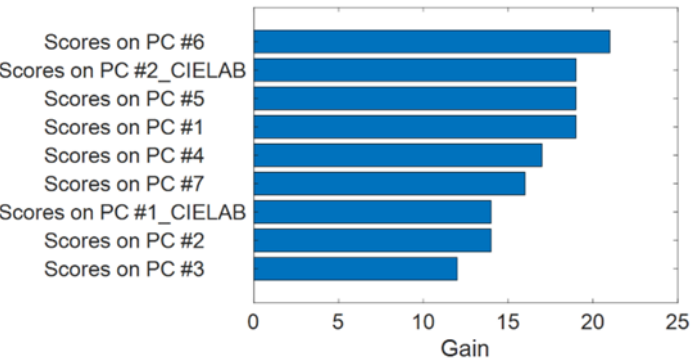

**Figure S33.** Gain of PC1-7 from PCA of A-TEEM data and PC1 and 2 from PCA of CIELAB data used to predict pepper aroma.

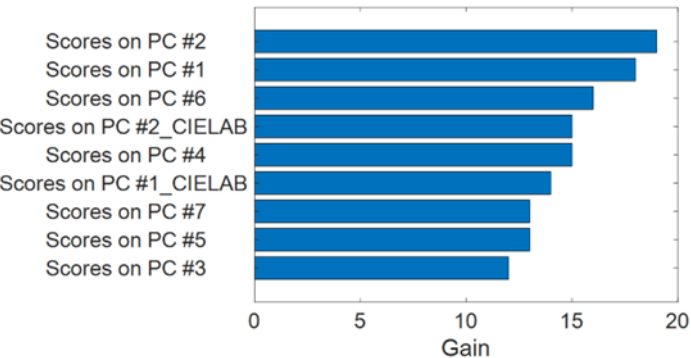

**Figure S34.** Gain of PC1-7 from PCA of A-TEEM data and PC1 and 2 from PCA of CIELAB data used to predict red fruit aroma.

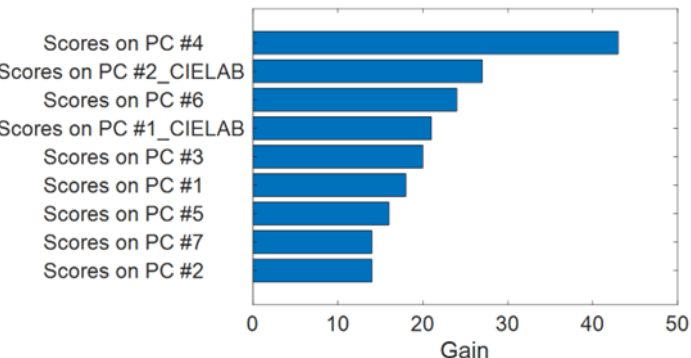

**Figure S35.** Gain of PC1-7 from PCA of A-TEEM data and PC1 and 2 from PCA of CIELAB data used to predict savoury aroma.

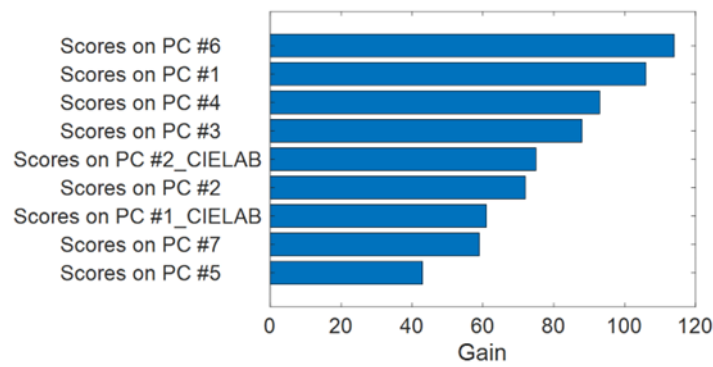

**Figure S36.** Gain of PC1-7 from principal component analysis (PCA) of A-TEEM data and PC1 and 2 from PCA of CIELAB data used to predict confectionery flavour.

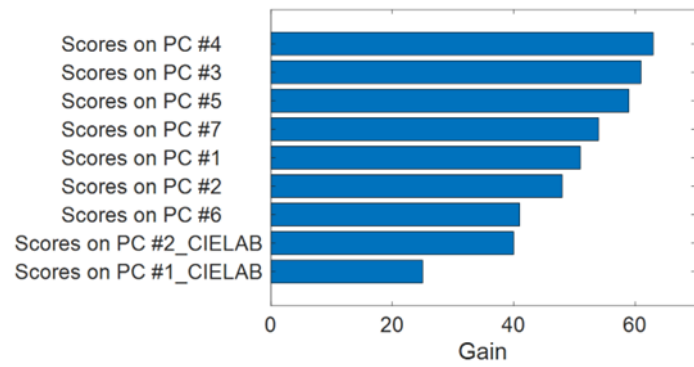

**Figure S37.** Gain of PC1-7 from PCA of A-TEEM data and PC1 and 2 from PCA of CIELAB data used to predict dark fruit flavour.

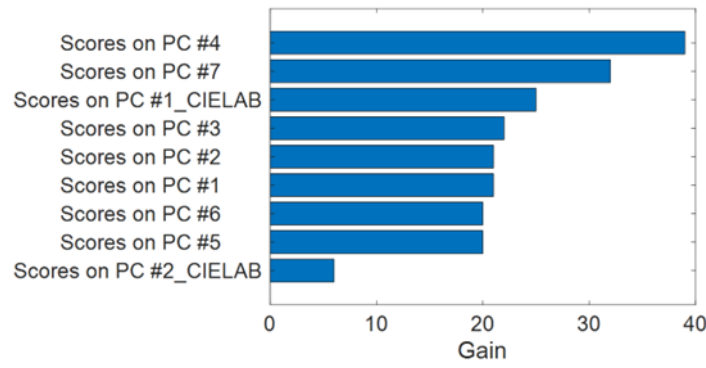

**Figure S38.** Gain of PC1-7 from PCA of A-TEEM data and PC1 and 2 from PCA of CIELAB data used to predict green flavour.

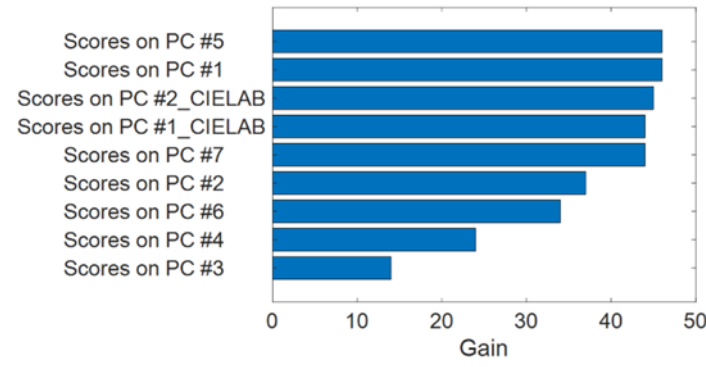

**Figure S39.** Gain of PC1-7 from PCA of A-TEEM data and PC1 and 2 from PCA of CIELAB data used to predict pepper flavour.

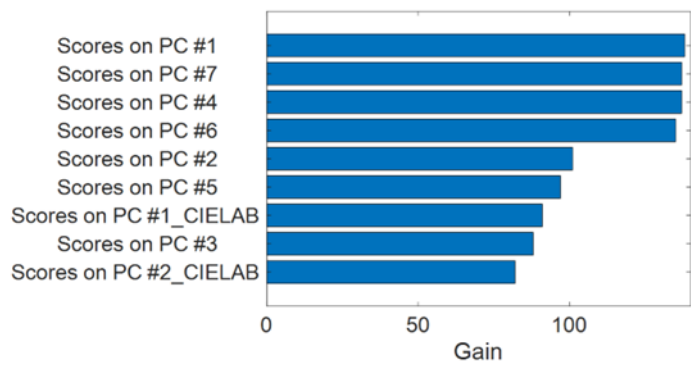

**Figure S40.** Gain of PC1-7 from principal component analysis (PCA) of A-TEEM data and PC1 and 2 from PCA of CIELAB data used to predict red fruit flavour.

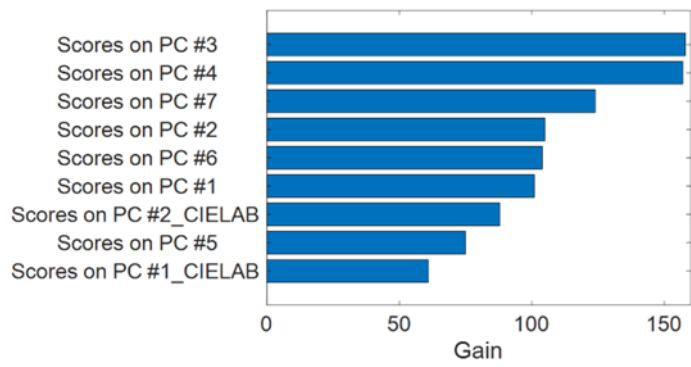

**Figure S41.** Gain of PC1-7 from PCA of A-TEEM data and PC1 and 2 from PCA of CIELAB data used to predict savoury flavour.

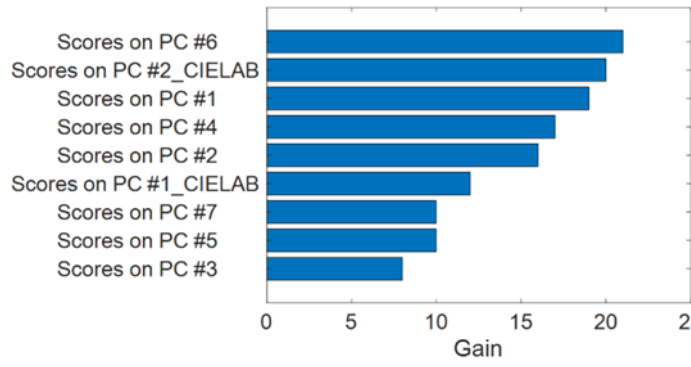

**Figure S42.** Gain of PC1-7 from PCA of A-TEEM data and PC1 and 2 from PCA of CIELAB data used to predict acid taste.

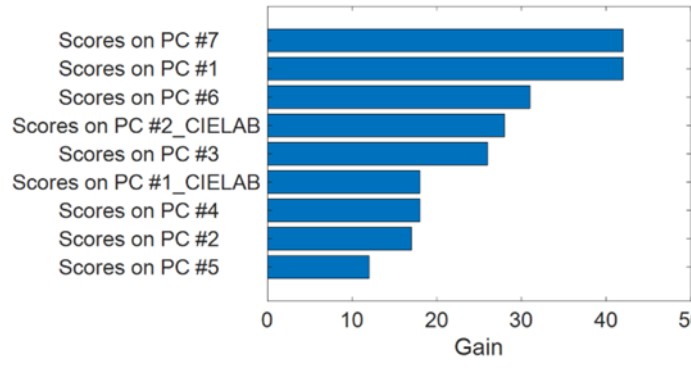

**Figure S43.** Gain of PC1-7 from PCA of A-TEEM data and PC1 and 2 from PCA of CIELAB data used to predict bitter taste.

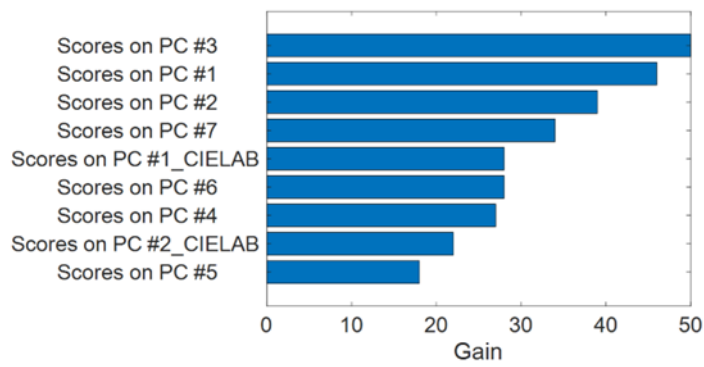

**Figure S44.** Gain of PC1-7 from principal component analysis (PCA) of A-TEEM data and PC1 and 2 from PCA of CIELAB data used to predict fruit sweetness taste.

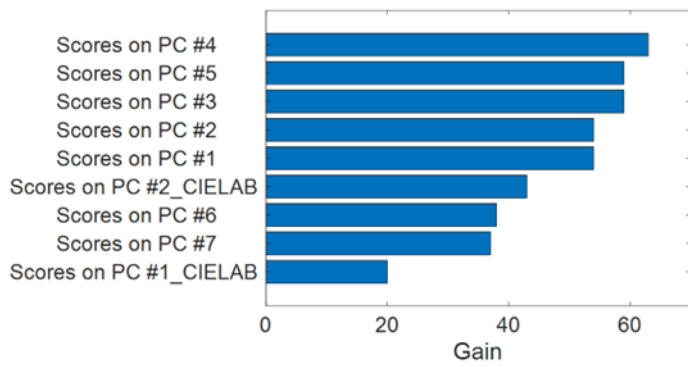

**Figure S45.** Gain of PC1-7 from PCA of A-TEEM data and PC1 and 2 from PCA of CIELAB data used to predict alcohol intensity mouthfeel.

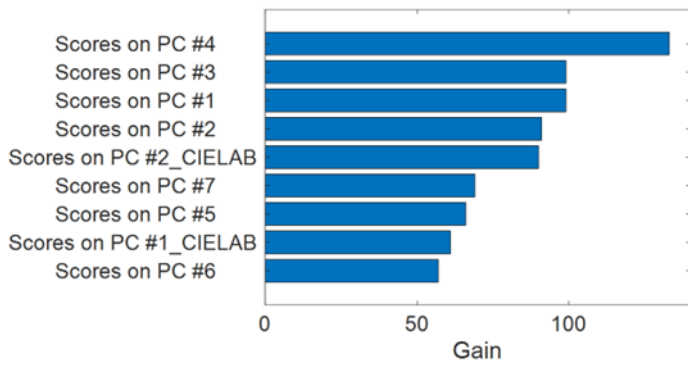

**Figure S46.** Gain of PC1-7 from PCA of A-TEEM data and PC1 and 2 from PCA of CIELAB data used to predict astringency mouthfeel.

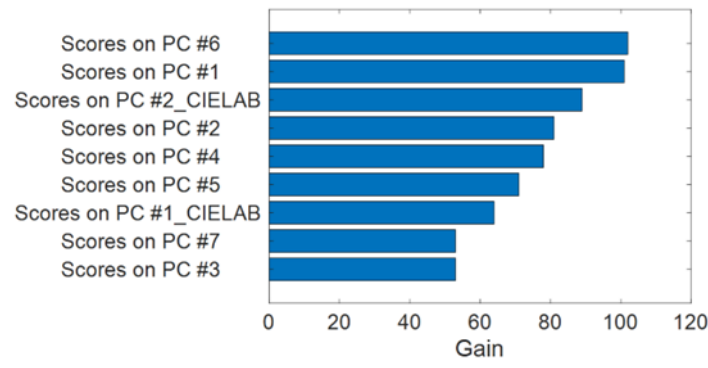

**Figure S47.** Gain of PC1-7 from PCA of A-TEEM data and PC1 and 2 from PCA of CIELAB data used to predict body mouthfeel.

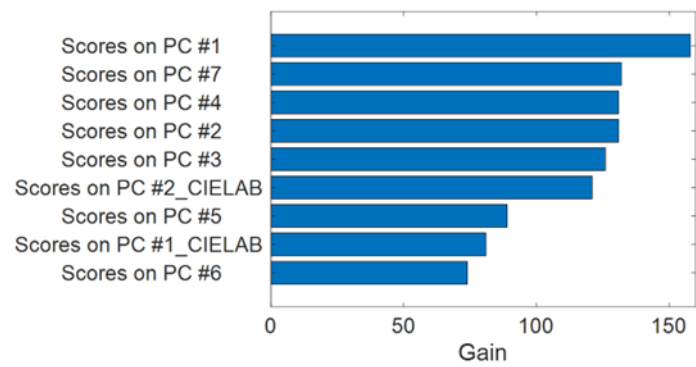

**Figure S48.** Gain of PC1-7 from principal component analysis (PCA) of A-TEEM data and PC1 and 2 from PCA of CIELAB data used to predict depth colour.

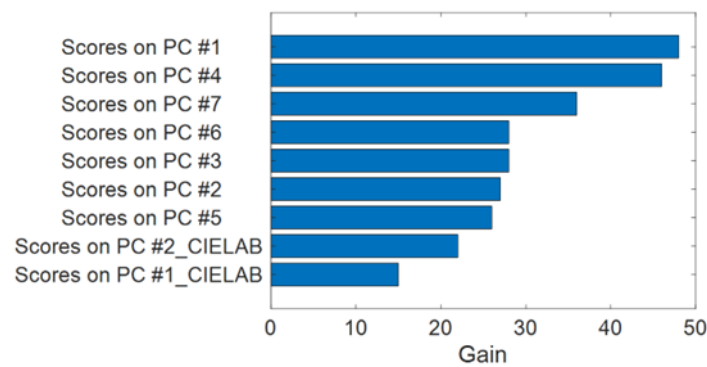

**Figure S49.** Gain of PC1-7 from PCA of A-TEEM data and PC1 and 2 from PCA of CIELAB data used to predict hue colour.
